# Supplementary material
Source: Springer Nature journal article supplement (https://www.springermedizin.de/resource/supplementary/12916_2012_503_MOESM1_ESM.pdf/9598040)

**A**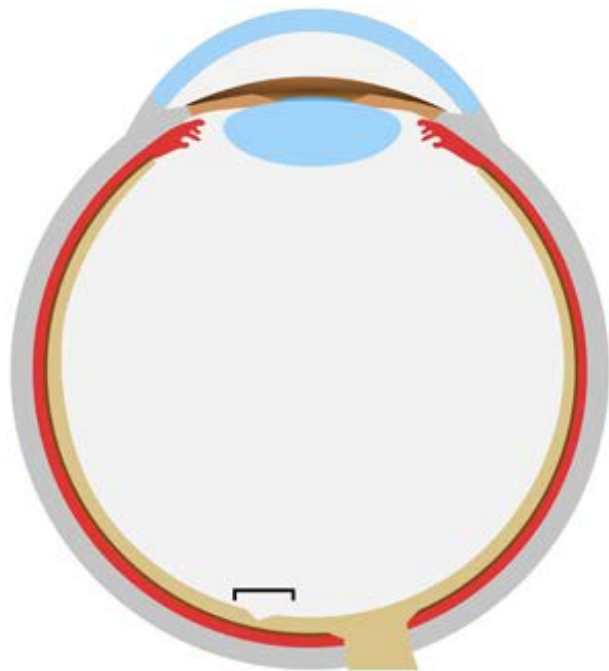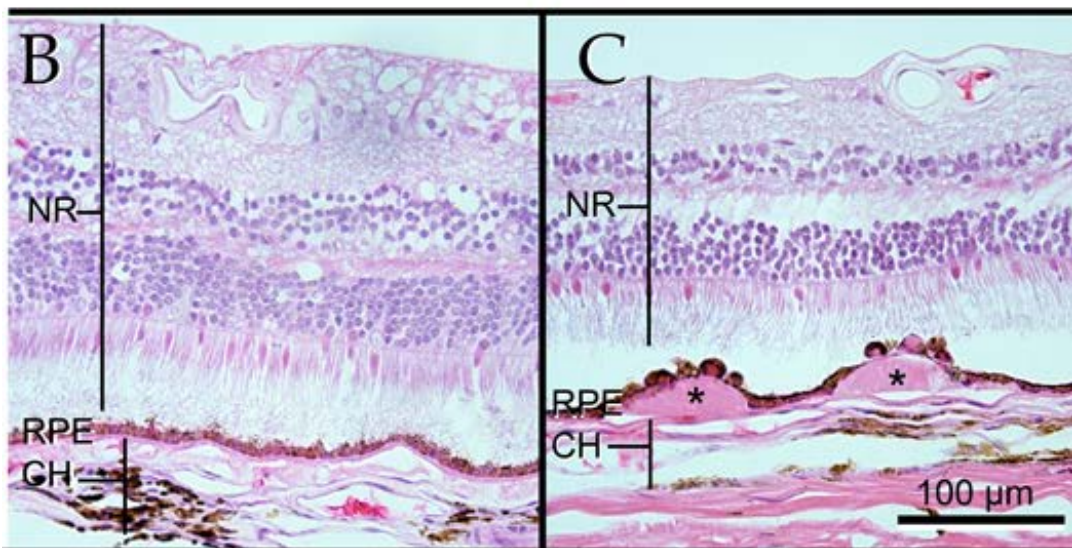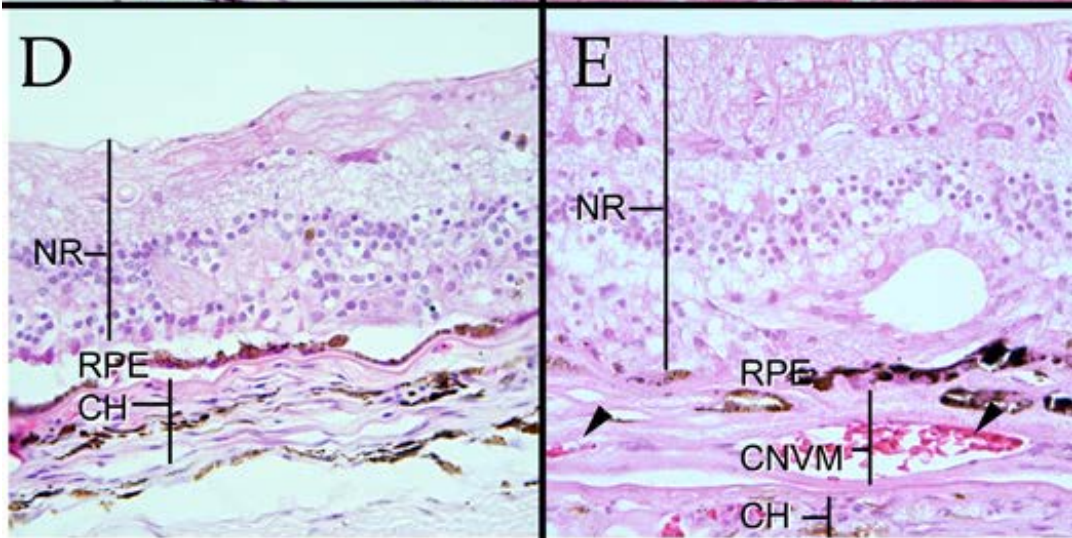

Supplement: MOESM1 [file 9598040]
